# Supplementary material
Source: publisher site journal article supplement (https://www.dovepress.com/article/535940)
Supplement: Supplementary file 1 [file 535940%20Revised%20Supplementary%20Table.docx]

| **Supplementary Table 1. Adjusted p-values from post hoc comparisons for polysomnographic variables with significant overall group differences.** | | | | | | | | | | | | | | | | |
| --- | --- | --- | --- | --- | --- | --- | --- | --- | --- | --- | --- | --- | --- | --- | --- | --- |
|  | Within-group comparisons with Kruskal-Wallis test | Post hoc analysis with Bonferroni correction | | | | | | | | | | | | | | |
|  | 1 vs 2 | 1 vs 3 | 1 vs 4 | | 1 vs 5 | | 2 vs 3 | 2 vs 4 | 2 vs 5 | | 3 vs 4 | | 3 vs 5 | | 4 vs 5 |
|  | *p* values | Adjusted p values | | |  | |  | |  | |  | |  | |  | |
| AHI | <0.001 | 0.027* | <0.001* | 0.002* | | <0.001* | | 0.001* | 1.000 | <0.001* | | <0.001* | | 1.000 | | <0.001* |
| AHI in R | <0.001 | 0.096 | <0.001* | 0.004* | | <0.001* | | 0.026* | 1.000 | <0.001* | | 0.015* | | 1.000 | | <0.001* |
| AI | <0.001 | 0.615 | <0.001* | 0.414 | | <0.001* | | <0.001* | 1.000 | <0.001* | | <0.001* | | 1.000 | | <0.001* |
| Desaturation index | <0.001 | 0.332 | <0.001* | 0.227 | | <0.001* | | <0.001* | 1.000 | <0.001* | | <0.001* | | 1.000 | | <0.001* |
| Sleep efficiency (%) | 0.048 | 1.000 | 1.000 | 1.000 | | 0.094 | | 1.000 | 1.000 | 0.353 | | 1.000 | | 1.000 | | 0.339 |
| Total sleep time | 0.03 | 1.000 | 1.000 | 1.000 | | 0.072 | | 1.000 | 1.000 | 0.250 | | 1.000 | | 1.000 | | 0.170 |
| Stage N1 (% of sleep period) | <0.001 | 0.173 | <0.001* | 0.410 | | <0.001* | | 0.417 | 1.000 | 0.022* | | 0.007* | | 1.000 | | <0.001* |
| Stage N2 (% of sleep period) | <0.001 | 0.442 | 0.022* | 0.142 | | <0.001* | | 1.000 | 1.000 | 0.065 | | 1.000 | | 1.000 | | 0.002* |
| Stage N3 (% of sleep period) | 0.015 | 1.000 | 1.000 | 1.000 | | 0.931 | | 1.000 | 1.000 | 1.000 | | 0.291 | | 1.000 | | 0.017* |
| Arousal index | <0.001 | 0.021* | <0.001* | 0.009* | | <0.001* | | 0.150 | 1.000 | <0.001* | | 0.008* | | 1.000 | | <0.001* |
| Longest apnea (seconds) | <0.001 | 0.041* | <0.001* | 0.096 | | <0.001* | | 0.02* | 1.000 | 0.03* | | <0.001* | | 1.000 | | <0.001* |
| Mean SpO2 (%) | <0.001 | 1.000 | 0.035* | 1.000 | | 0.016* | | 0.025* | 1.000 | 0.006* | | 0.017* | | 1.000 | | 0.001* |
| Lowest SpO2 (%) | <0.001 | 0.339 | <0.001* | 0.229 | | <0.001* | | <0.001* | 1.000 | <0.001* | | <0.001* | | 1.000 | | <0.001* |
| Time below 85% (seconds) | <0.001 | 0.339 | <0.001* | 0.229 | | <0.001* | | 0.001* | 1.000 | <0.001* | | <0.001* | | 1.000 | | <0.001* |
| Group 1: PWE-only; Group 2: PWE+OSA with low rAT; Group 3: PWE+OSA with high rAT; Group 4: OSA-only with low rAT; Group 5: OSA-only with high rAT.  PWE, patients with epilepsy, OSA, obstructive sleep apnea; rAT, respiratory arousal threshold; AHI, apnea-hypopnea index; AHI in R, apnea-hypopnea index in REM sleep stage; AI, apnea index; PLMS, periodic leg movement during sleep. | | | | | | | | | | | | | | | | |
|  |
|  |
| A p value or adjusted p value <0.05 was considered significant | | | | | | | | | | | | | | | | |  |
| Asterisks ( * ) denote variables with a significant pairwise difference after post hoc correction. | | | | | | | | | | | | | | | | |  |
